# Supplementary material for: Production of aromatics from butanol over Ga-promoted HZSM5 catalysts: tuning of benzene–toluene–xylene and ethylbenzene (BTEX) selectivity
Source: Royal Society of Chemistry journal article supplement (doi:10.1039/d1re00531f), 2022-01-01
Supplement: d1re00531f1.pdf [file d1re00531f1.pdf]

## **Supplementary information**

### **Production of aromatics from butanol over Ga-promoted HZSM5 catalysts: Tuning of benzene-toluene-xylene and ethylbenzene (BTEX) selectivity**

Tatinaidu Kella, Debaprasad Shee\*

Department of Chemical Engineering, Indian Institute of Technology Hyderabad, Kandi – 502  
284, Sangareddy, Telangana, India

---

\*Corresponding author at: Department of Chemical Engineering, Indian Institute of Technology  
Hyderabad, Kandi 502284, Sangareddy, Telangana, India.

Tel.: +914023016210; fax: +914023016000.

E-mail address: [dshee@che.iith.ac.in](mailto:dshee@che.iith.ac.in) (Dr. Debaprasad Shee)

**Table S1** Reproducibility of experimental runs over 5Ga-HZSM5 catalysts for the conversion of butanol to aromatics.

|              | Selectivity, % <sup>a</sup>    |                                |                                 |           |       |                  | Carbon balance<br>(% error) |
|--------------|--------------------------------|--------------------------------|---------------------------------|-----------|-------|------------------|-----------------------------|
|              | C <sub>1</sub> -C <sub>2</sub> | C <sub>3</sub> -C <sub>4</sub> | C <sub>5</sub> -C <sub>12</sub> | Aromatics | BTEX  | Higher aromatics |                             |
| <b>Run 1</b> | 2.55                           | 51.97                          | 0.53                            | 44.86     | 37.79 | 7.07             | 4.53                        |
| <b>Run 2</b> | 2.63                           | 53.76                          | 0.55                            | 43.07     | 36.59 | 6.47             | 5.26                        |
| <b>Run 3</b> | 2.50                           | 51.95                          | 0.56                            | 44.99     | 38.04 | 6.95             | 5.18                        |

<sup>a</sup>Reaction conditions: Temperature = 673 K; WHSV = 0.75 h<sup>-1</sup>; Pressure = 1 bar.

|              | Selectivity, % <sup>b</sup>    |                                |                                 |           |       |                  | Carbon balance<br>(% error) |
|--------------|--------------------------------|--------------------------------|---------------------------------|-----------|-------|------------------|-----------------------------|
|              | C <sub>1</sub> -C <sub>2</sub> | C <sub>3</sub> -C <sub>4</sub> | C <sub>5</sub> -C <sub>12</sub> | Aromatics | BTEX  | Higher aromatics |                             |
| <b>Run 4</b> | 27.48                          | 13.02                          | 0.09                            | 58.05     | 43.00 | 15.05            | 34.85                       |
| <b>Run 5</b> | 33.08                          | 11.47                          | 0.05                            | 53.85     | 41.30 | 12.55            | 32.15                       |

<sup>b</sup>Reaction conditions: Temperature = 823 K; WHSV = 0.75 h<sup>-1</sup>; Pressure = 20 bar.

**Table S2** Selectivity of C<sub>9</sub>-C<sub>13</sub> aromatics over 5Ga-HZSM5 catalyst for the conversion of butanol to aromatics, Reaction conditions: Temperature = 823 K; WHSV = 0.75 h<sup>-1</sup>.

| Reaction Pressure<br>(bar) | Selectivity, % |                 |                 |                 |                 | Total<br>Higher aromatics | Carbon<br>balance<br>(% error) |
|----------------------------|----------------|-----------------|-----------------|-----------------|-----------------|---------------------------|--------------------------------|
|                            | C <sub>9</sub> | C <sub>10</sub> | C <sub>11</sub> | C <sub>12</sub> | C <sub>13</sub> |                           |                                |
| 1                          | 1.58           | 2.79            | 1.48            | 1.09            | 0.13            | 7.07                      | 4.53                           |
| 5                          | 2.86           | 3.46            | 3.25            | 1.03            | 0.37            | 10.96                     | 8.41                           |
| 10                         | 3.06           | 4.01            | 3.65            | 1.15            | 0.78            | 12.65                     | 11.52                          |
| 20                         | 3.74           | 4.71            | 4.58            | 1.55            | 0.47            | 15.05                     | 34.85                          |
| 30                         | 3.69           | 5.37            | 5.11            | 1.62            | 0.57            | 16.36                     | 47.08                          |

| Catalyst         | S <sub>A</sub> <sup>BET</sup> <sup>a</sup><br>(m <sup>2</sup> /g) | A <sub>E</sub> <sup>b</sup><br>(m <sup>2</sup> /g) | V <sub>T</sub> <sup>c</sup><br>(cm <sup>3</sup> /g) | V <sub>m</sub> <sup>d</sup><br>(cm. <sup>3</sup> /g) | A <sub>m</sub> <sup>e</sup><br>(m <sup>2</sup> /g) |
|------------------|-------------------------------------------------------------------|----------------------------------------------------|-----------------------------------------------------|------------------------------------------------------|----------------------------------------------------|
| Fresh 5Ga-HZSM5  | 350                                                               | 143                                                | 0.25                                                | 0.10                                                 | 207                                                |
| 5Ga-HZSM5_1 bar  | 282                                                               | 155                                                | 0.23                                                | 0.06                                                 | 127                                                |
| 5Ga-HZSM5_5 bar  | 270                                                               | 125                                                | 0.23                                                | 0.07                                                 | 145                                                |
| 5Ga-HZSM5_10 bar | 258                                                               | 112                                                | 0.22                                                | 0.07                                                 | 146                                                |
| 5Ga-HZSM5_20 bar | 281                                                               | 172                                                | 0.22                                                | 0.06                                                 | 108                                                |
| 5Ga-HZSM5_30 bar | 239                                                               | 79                                                 | 0.20                                                | 0.08                                                 | 159                                                |

**Table S3** Textural properties of spent 5Ga-HZSM5 catalysts.

<sup>a</sup>BET surface area, <sup>b</sup>external surface area derived from t-Plot method, <sup>c</sup>total pore volume derived from BJH method, <sup>d</sup>micropore volume derived from t-Plot method, <sup>e</sup>micropore surface area derived from t-Plot method



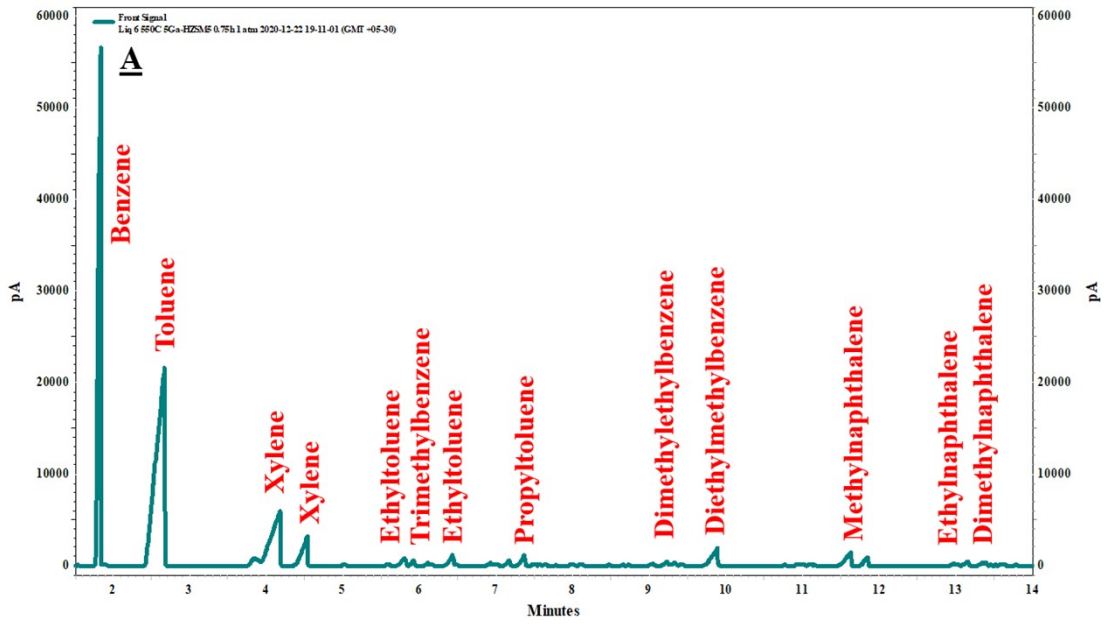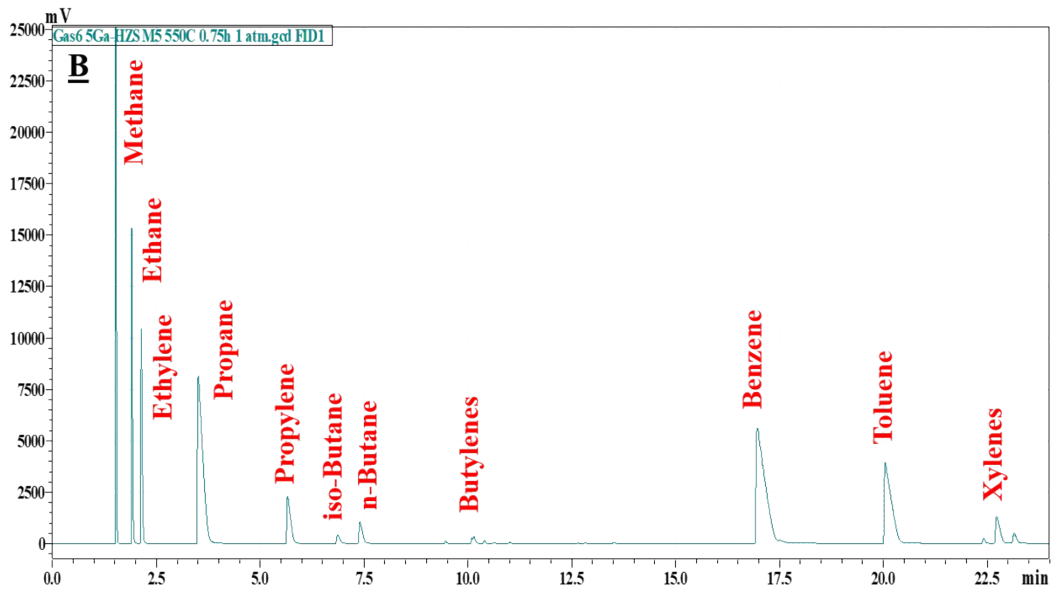

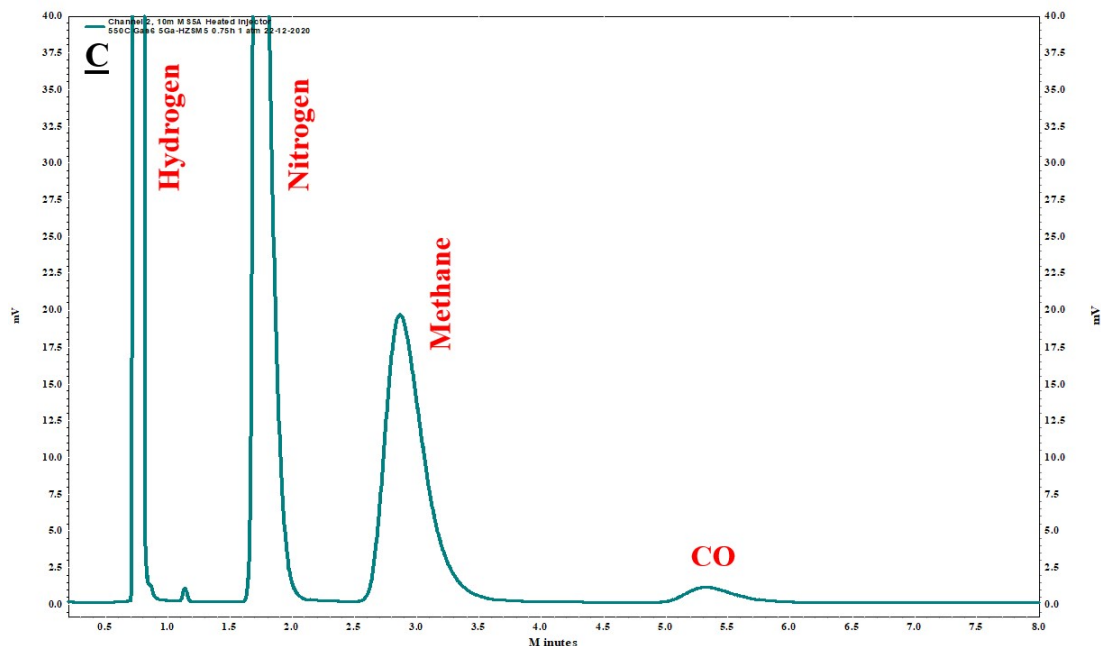

**Fig. S1** GC chromatograms for A) liquid sample analysis by FID, B) gas sample analysis by FID, C) permanent gas analysis by TCD. Reaction conditions: Temperature = 823 K; WHSV = 0.75 h<sup>-1</sup>; Pressure = 1 atm, 5Ga-HZSM5 catalyst.

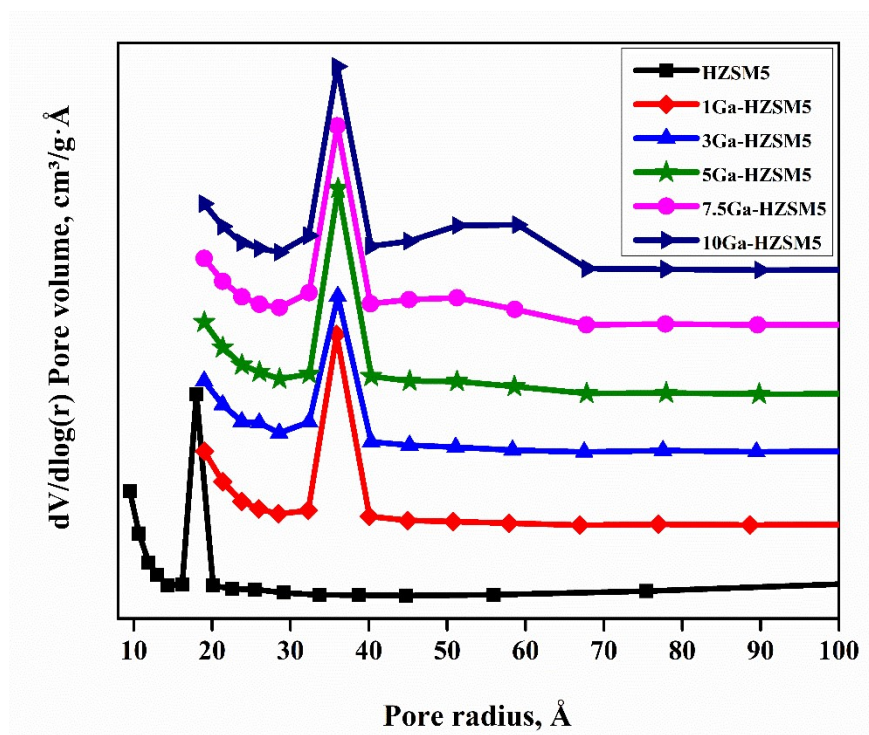

**Fig. S2** Pore size distribution of xGa-HZSM5 (x = 0 to 10 wt%) catalysts.

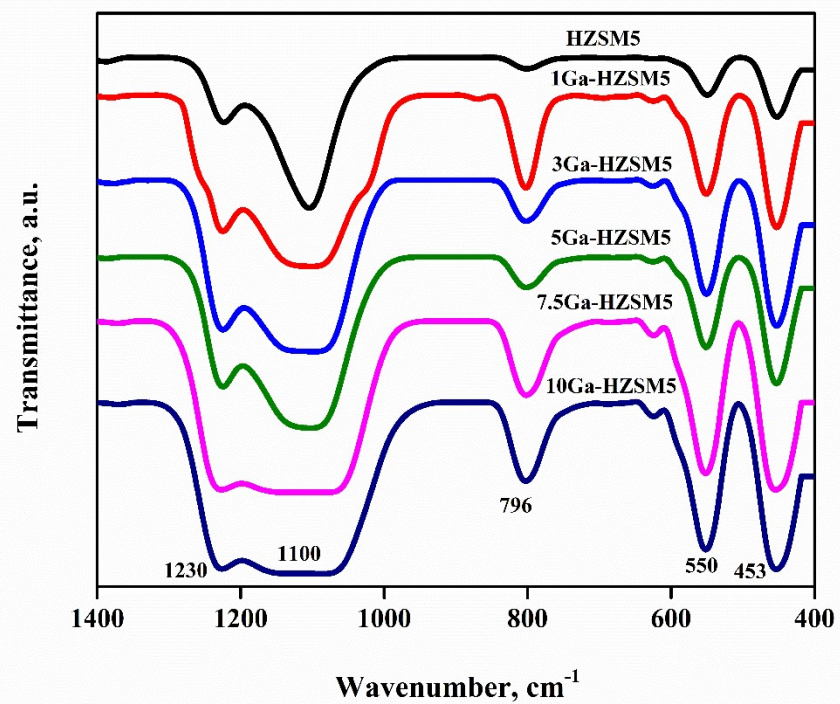

Fig. S3 FTIR spectra of xGa-HZSM5 (x = 0 to 10 wt%) catalysts.

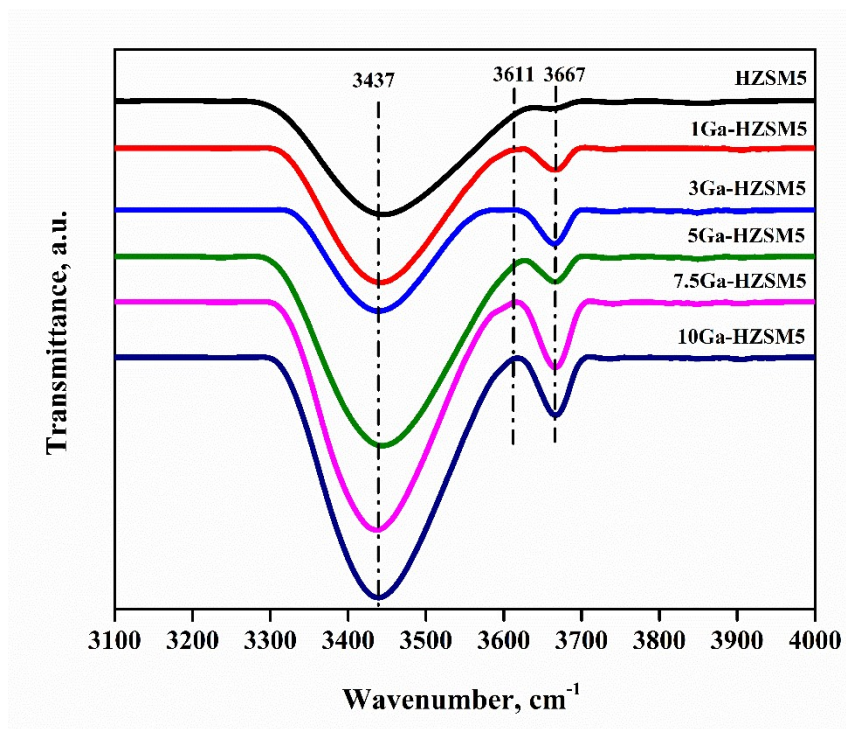

Fig. S4 FTIR spectra of xGa-HZSM5 (x = 0 to 10 wt%) catalysts in the hydroxyl region.



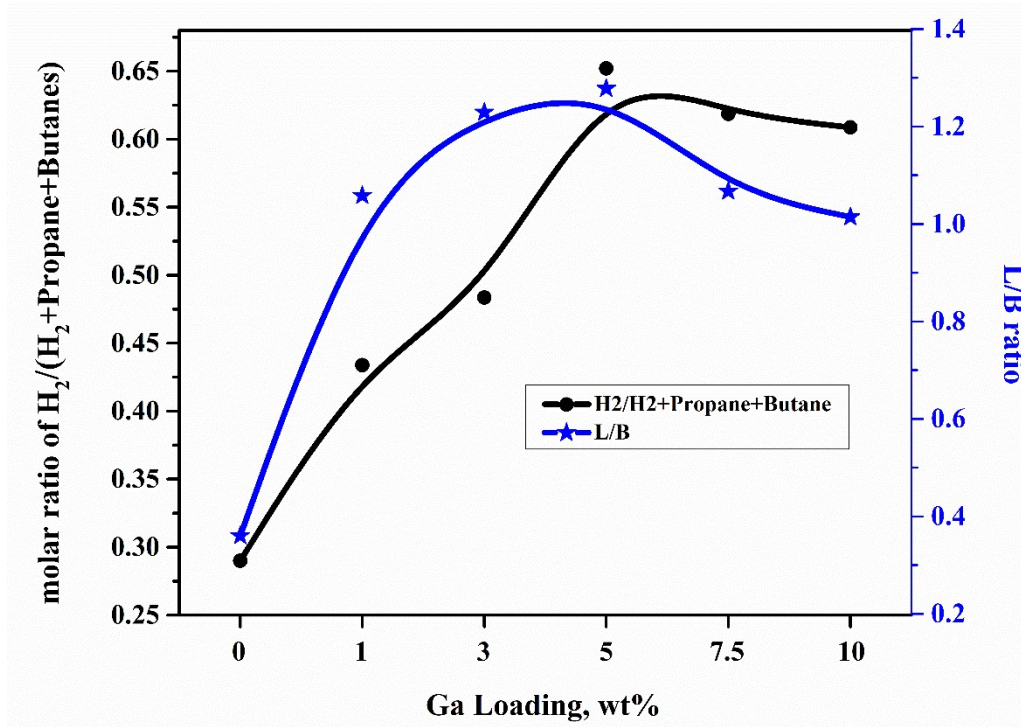

**Fig. S5** Molar ratios of H<sub>2</sub>/(H<sub>2</sub>+Propane+Butanes) and L/B ratio as a function of Ga loading, Reaction conditions: Temperature = 673 K; WHSV = 0.75 h<sup>-1</sup>; Pressure = 1 atm.

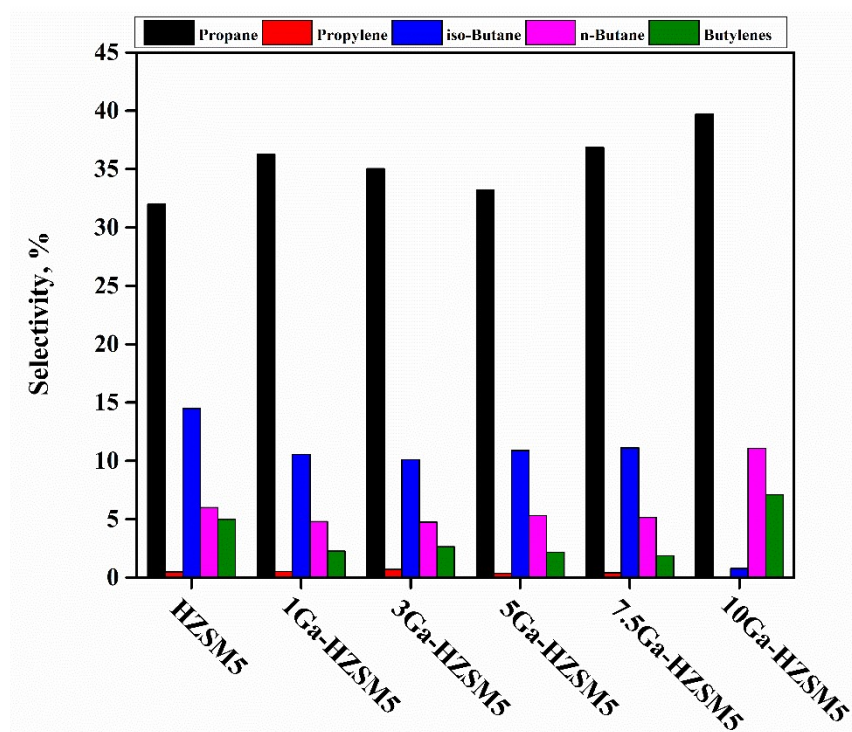

**Fig. S6** Effect of Ga loading on selectivity of C<sub>3</sub> - C<sub>4</sub> hydrocarbons, Reaction conditions: Temperature = 673 K; WHSV = 0.75 h<sup>-1</sup>; Pressure = 1 atm.



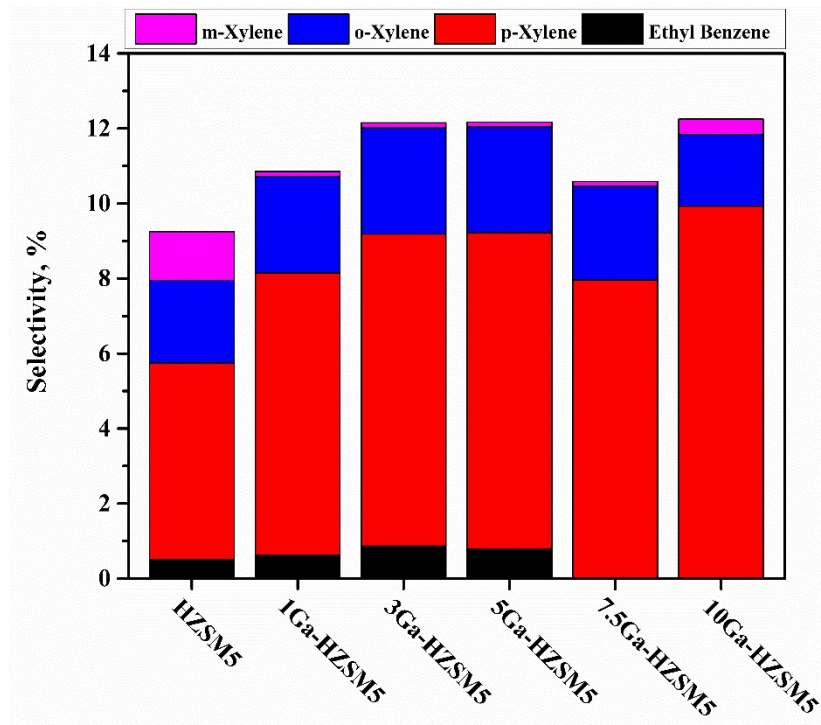

**Fig. S7** Effect of Ga loading on selectivity of C<sub>8</sub> hydrocarbons, Reaction conditions: Temperature = 673 K; WHSV = 0.75 h<sup>-1</sup>; Pressure = 1 atm.

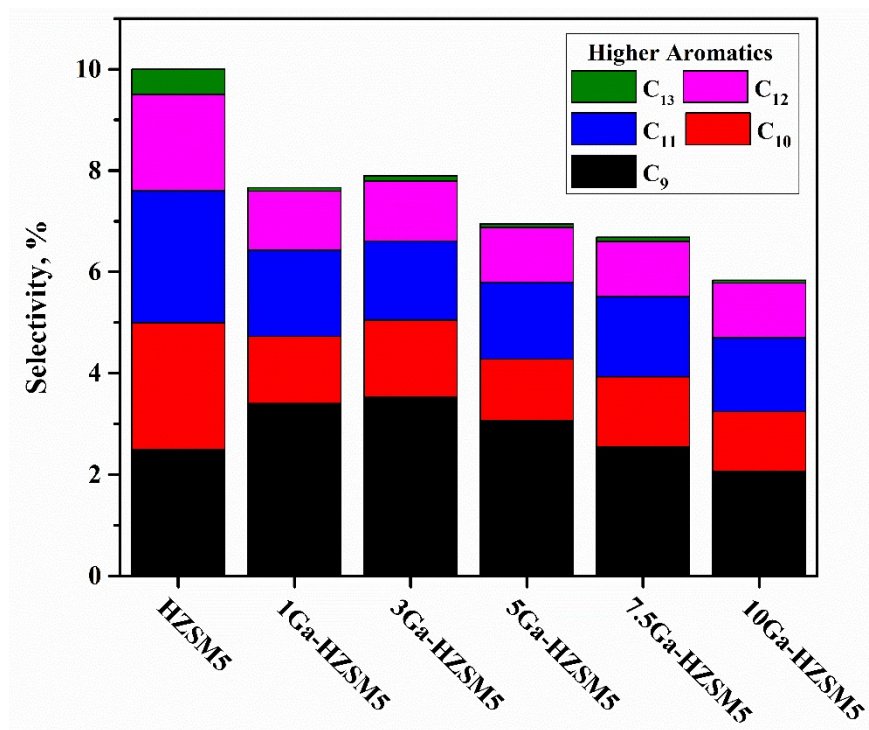

**Fig. S8** Effect of Ga loading on selectivity of higher aromatics, Reaction conditions: Temperature = 673 K; WHSV = 0.75 h<sup>-1</sup>; Pressure = 1 atm.

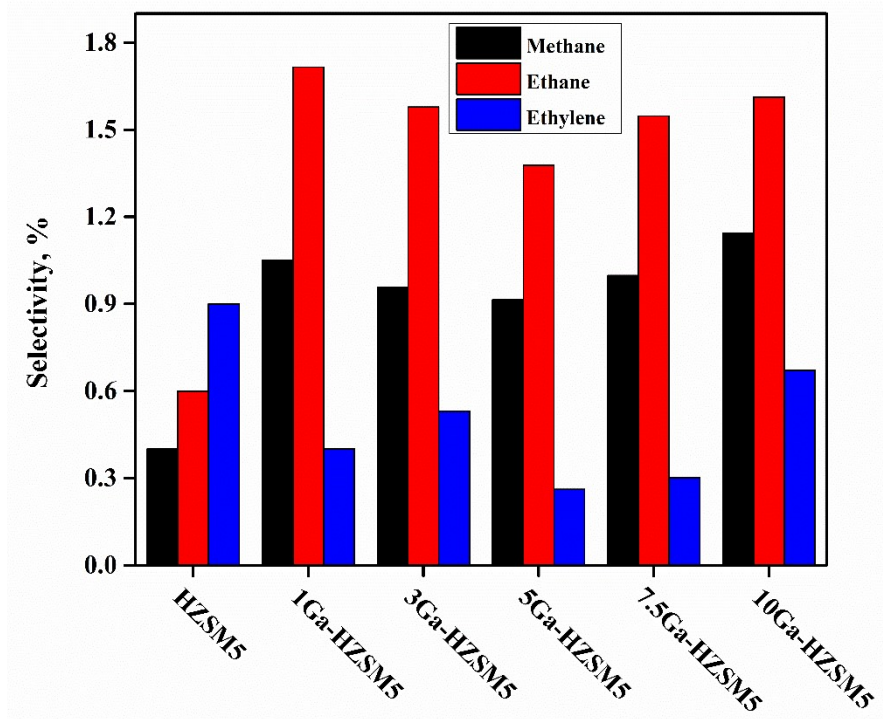

**Fig. S9** Effect of Ga loading on selectivity of C<sub>1</sub> - C<sub>2</sub> hydrocarbons, Reaction conditions: Temperature = 673 K; WHSV = 0.75 h<sup>-1</sup>; Pressure = 1 atm.

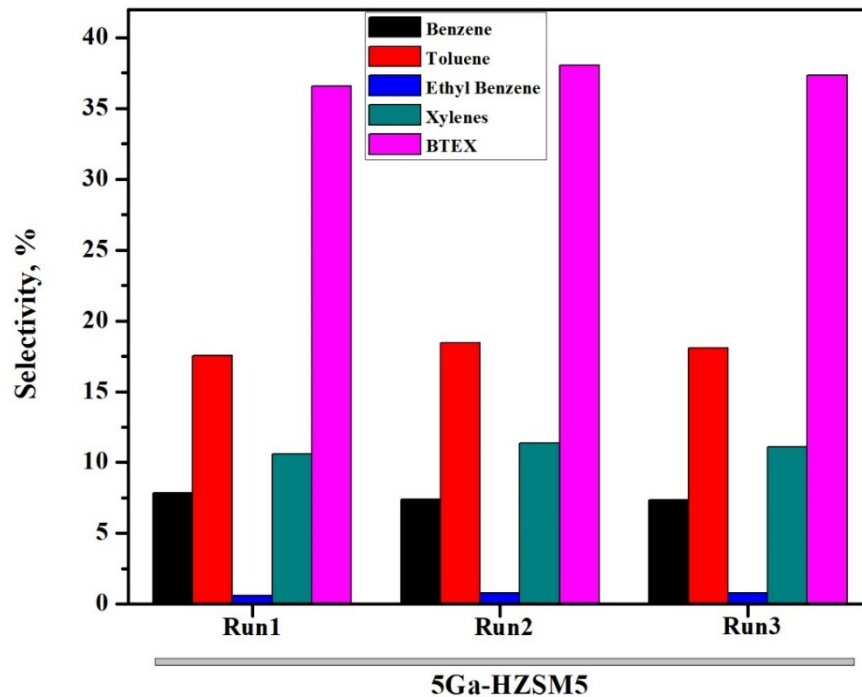

**Fig. S10** Reproducibility of BTEX hydrocarbons, Reaction conditions: Temperature = 673 K; WHSV = 0.75 h<sup>-1</sup>; Pressure = 1 atm; 5Ga-HZSM5 catalyst.

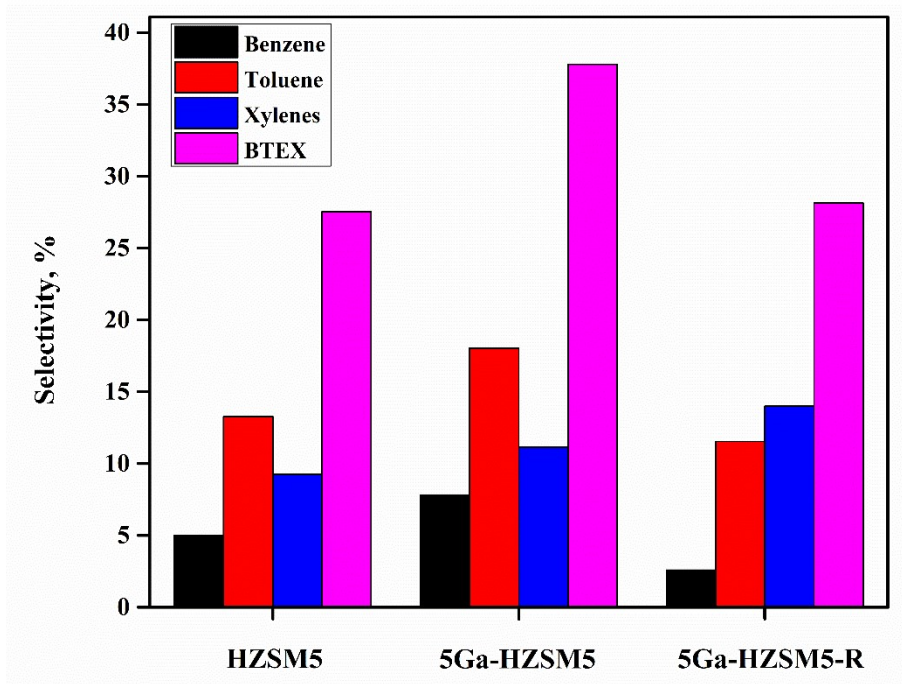

**Fig. S11** Selectivity for BTEX hydrocarbons over HZSM5, 5Ga-HZSM5, and reduced 5Ga-HZSM5 catalysts, Reaction conditions: Temperature = 673 K; WHSV = 0.75 h<sup>-1</sup>; Pressure = 1 atm.

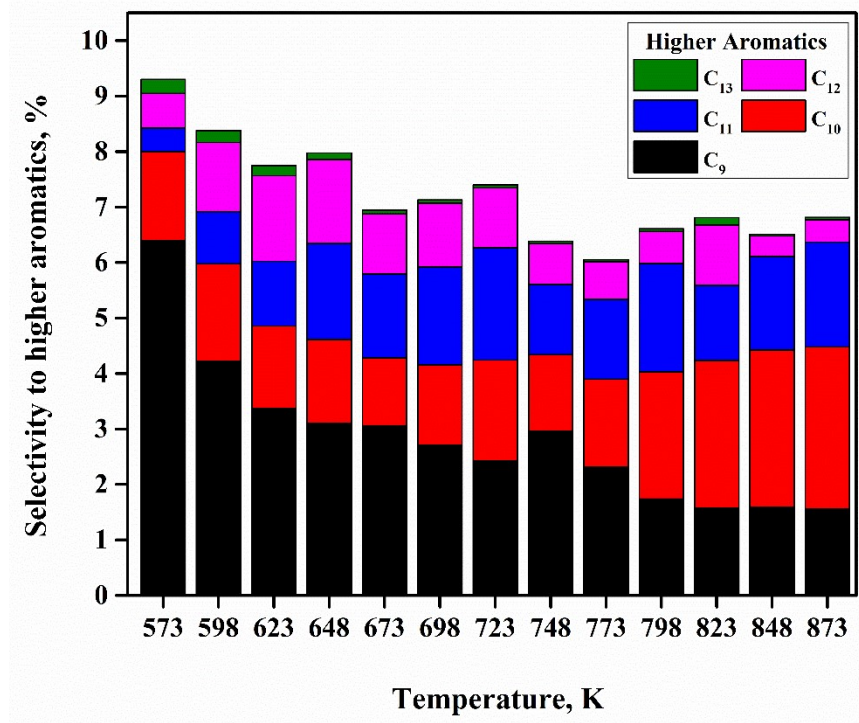

**Fig. S12** Effect of temperature on the selectivity of higher aromatics, Reaction conditions: WHSV = 0.75 h<sup>-1</sup>; Pressure = 1 atm; 5Ga-HZSM5 catalyst.

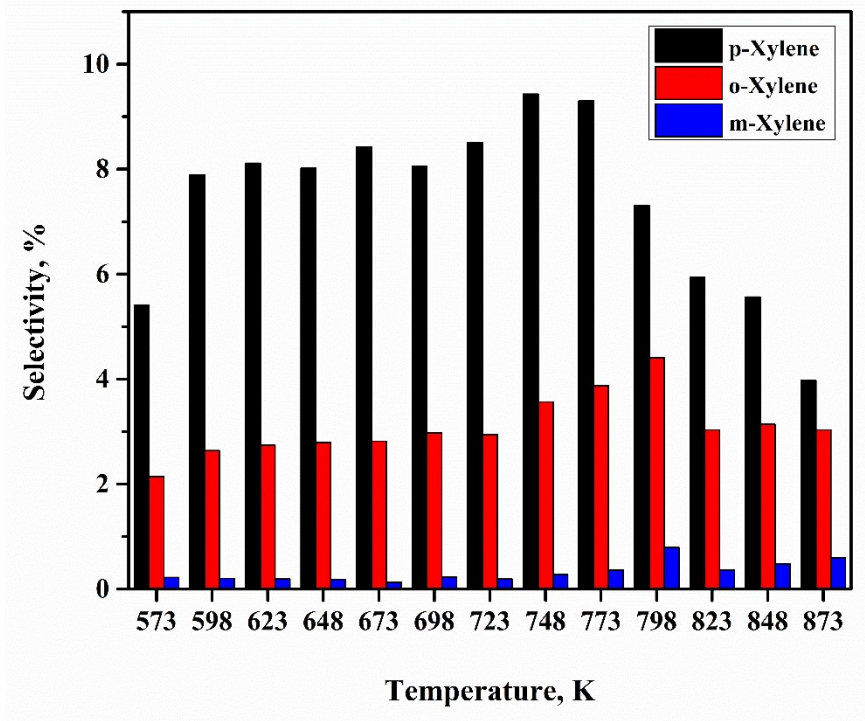

**Fig. S13** Effect of temperature on selectivity of xylene isomers, Reaction conditions: WHSV = 0.75 h<sup>-1</sup>; Pressure = 1 atm; 5Ga-HZSM5 catalyst.

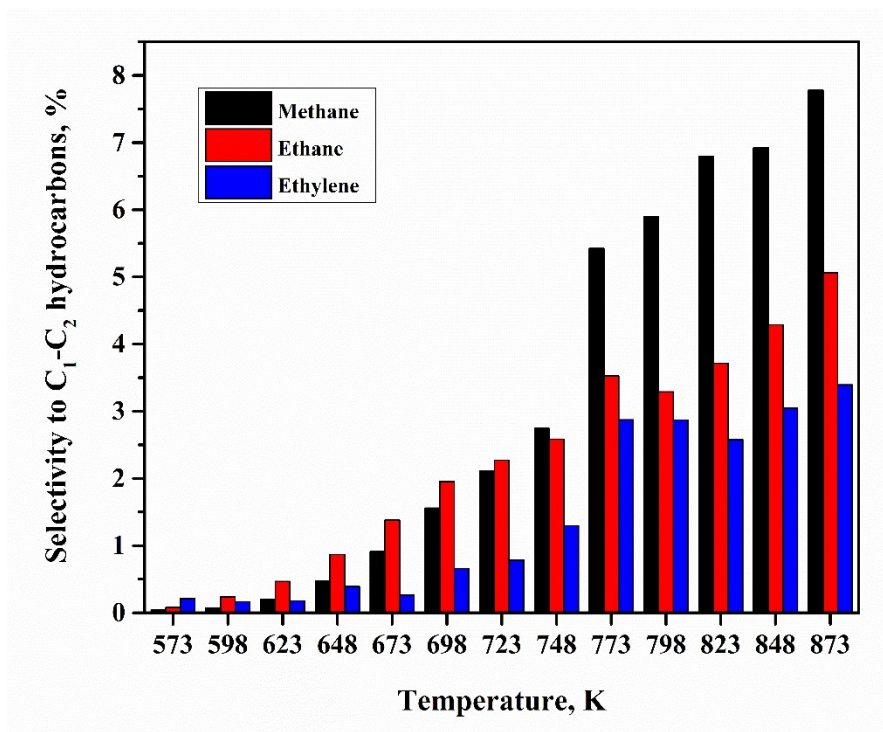

**Fig. S14** Effect of temperature on selectivity of C<sub>1</sub> - C<sub>2</sub> hydrocarbons, Reaction conditions: WHSV = 0.75 h<sup>-1</sup>; Pressure = 1 atm; 5Ga-HZSM5 catalyst.



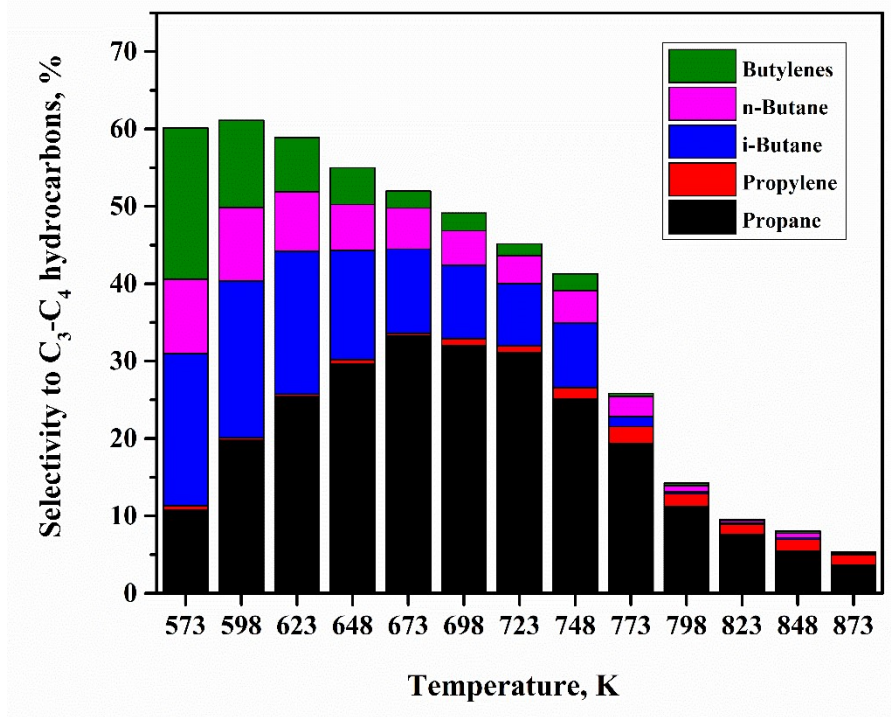

**Fig. S15** Effect of temperature on selectivity of C<sub>3</sub> - C<sub>4</sub> hydrocarbons, Reaction conditions: WHSV = 0.75 h<sup>-1</sup>; Pressure = 1 atm; 5Ga-HZSM5 catalyst.

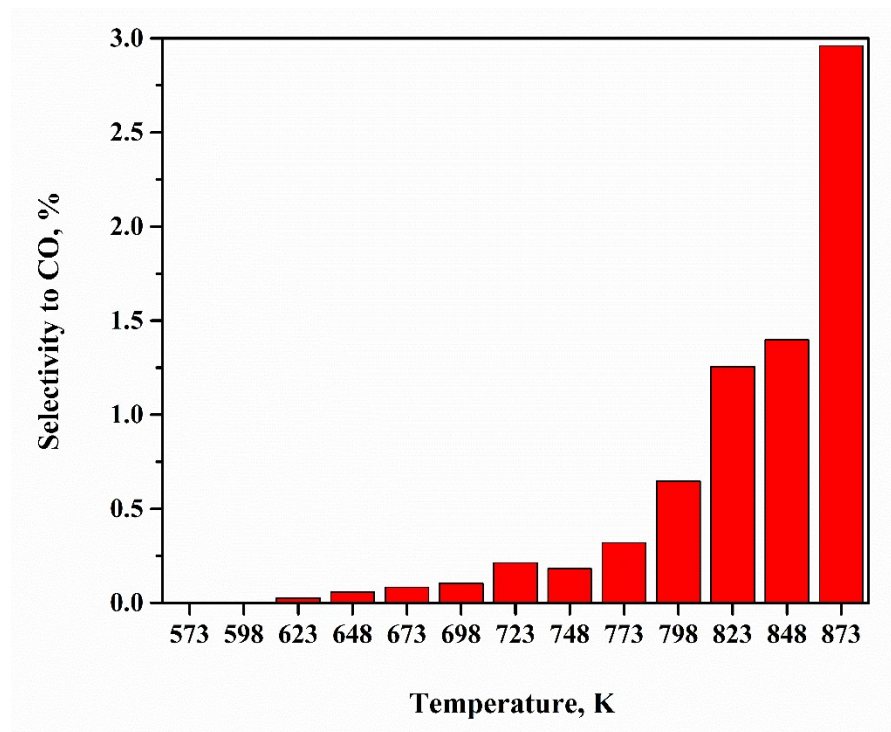

**Fig. S16** Effect of temperature on the selectivity of CO, Reaction conditions: WHSV = 0.75 h<sup>-1</sup>; Pressure = 1 atm; 5Ga-HZSM5 catalyst.

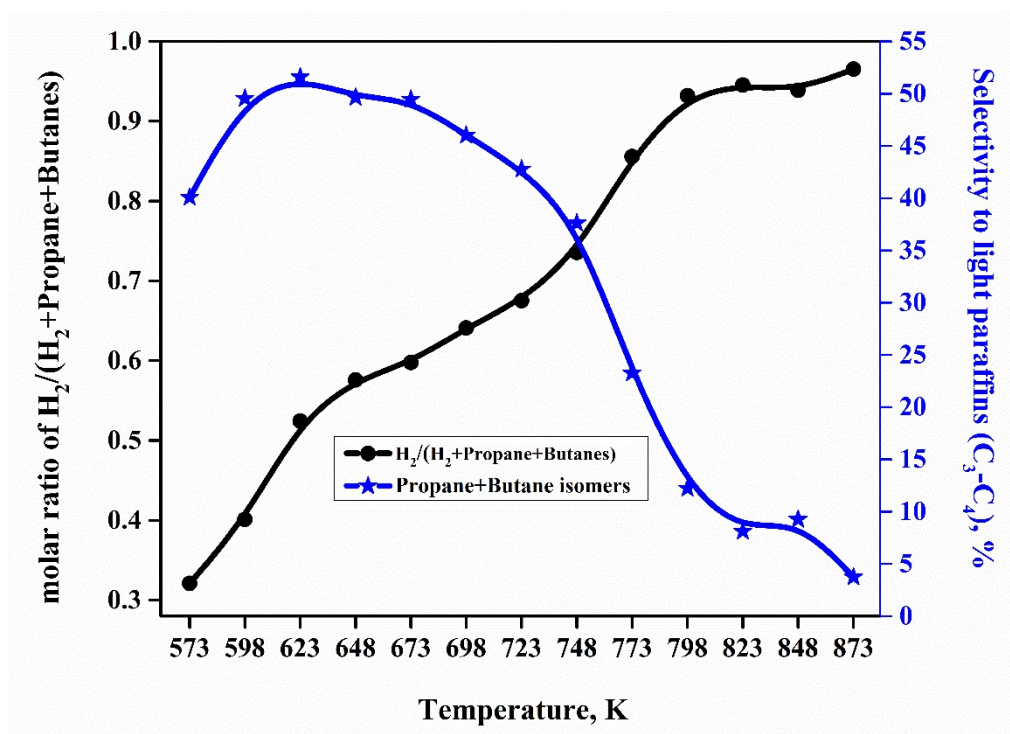

**Fig. S17** Effect of temperature on molar ratios of  $H_2/(H_2+Propane+Butanes)$  and  $C_3-C_4$  paraffins, Reaction conditions: WHSV =  $0.75\text{ h}^{-1}$ ; Pressure = 1 atm; 5Ga-HZSM5 catalyst.

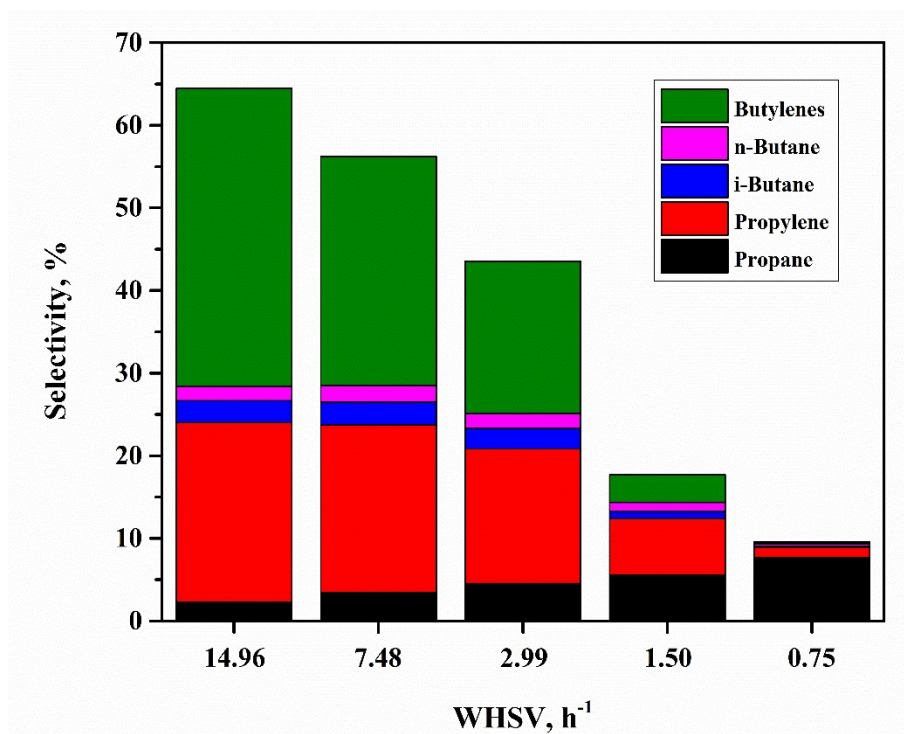

**Fig. S18** Effect of WHSV on selectivity of  $C_3-C_4$  hydrocarbons, Reaction conditions: Temperature = 823 K; Pressure = 1 atm; 5Ga-HZSM5 catalyst.

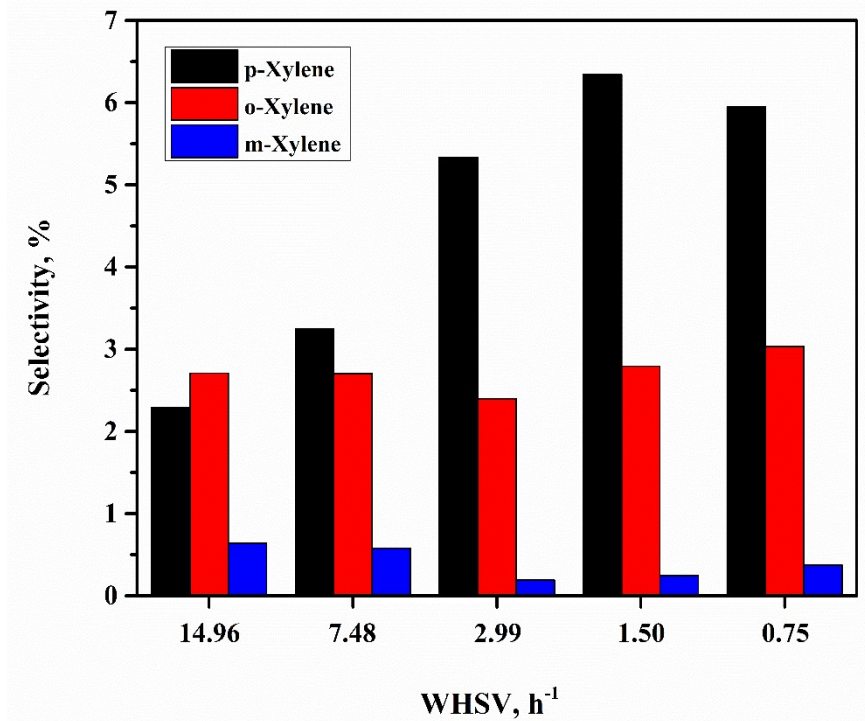

**Fig. S19** Effect of WHSV on selectivity of xylene isomers, Reaction conditions: Temperature = 823 K; Pressure = 1 atm; 5Ga-HZSM5 catalyst.

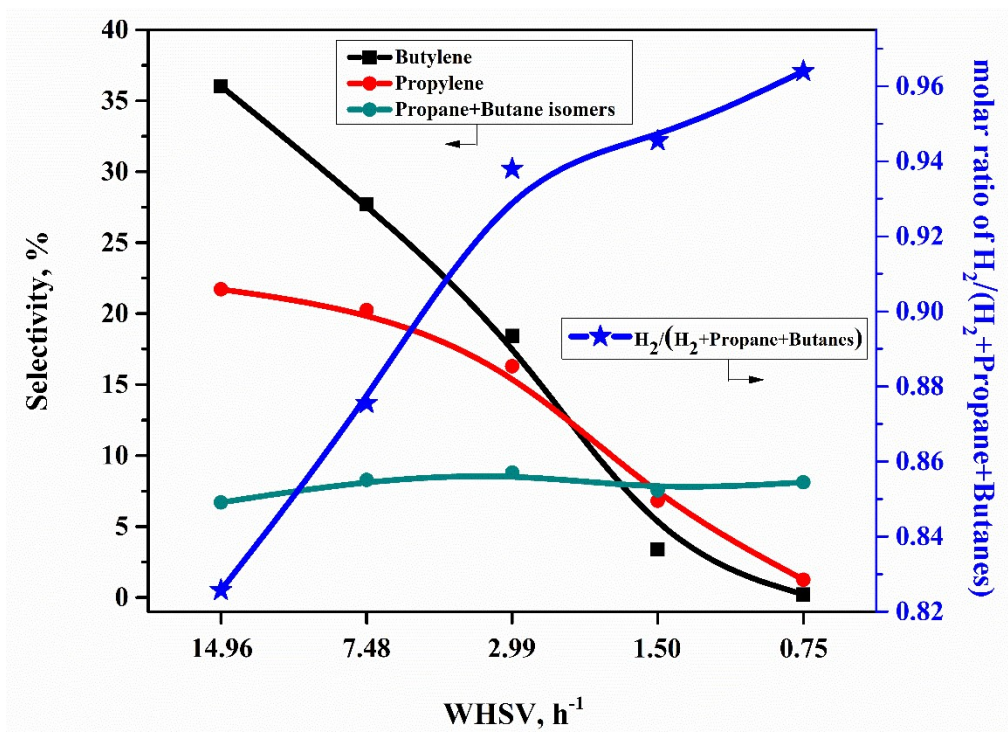

**Fig. S20** Effect of WHSV on molar ratios of H<sub>2</sub>/(H<sub>2</sub>+Propane+Butanes) and C<sub>3</sub>-C<sub>4</sub> hydrocarbons selectivity, Reaction conditions: Temperature = 823 K; Pressure = 1 atm; 5Ga-HZSM5 catalyst.



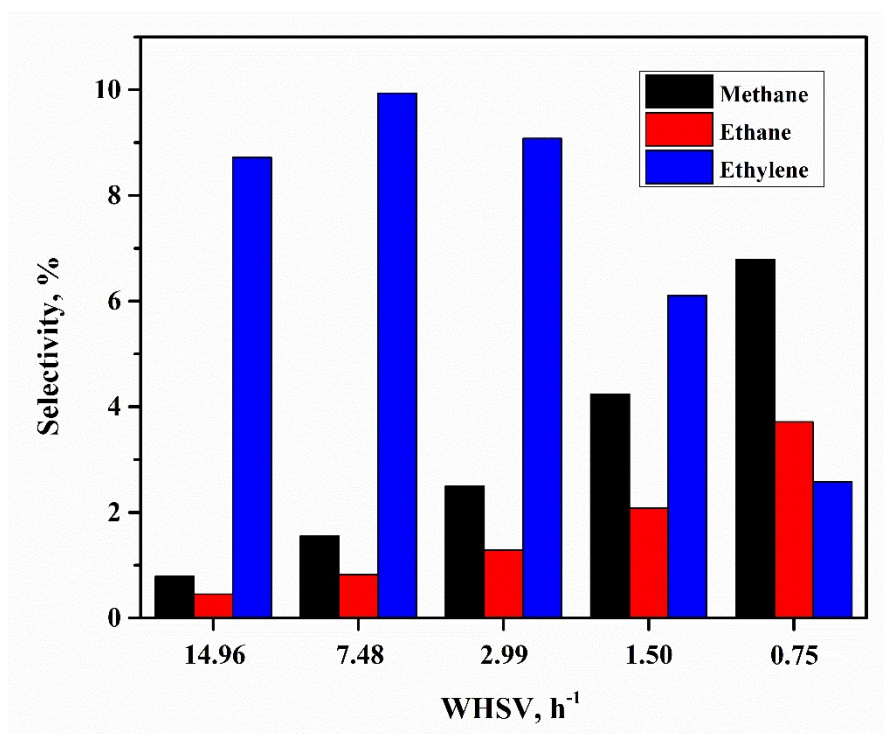

**Fig. S21** Effect of WHSV on selectivity of C<sub>1</sub>-C<sub>2</sub> hydrocarbons, Reaction conditions: Temperature = 823 K; Pressure = 1 atm; 5Ga-HZSM5 catalyst.

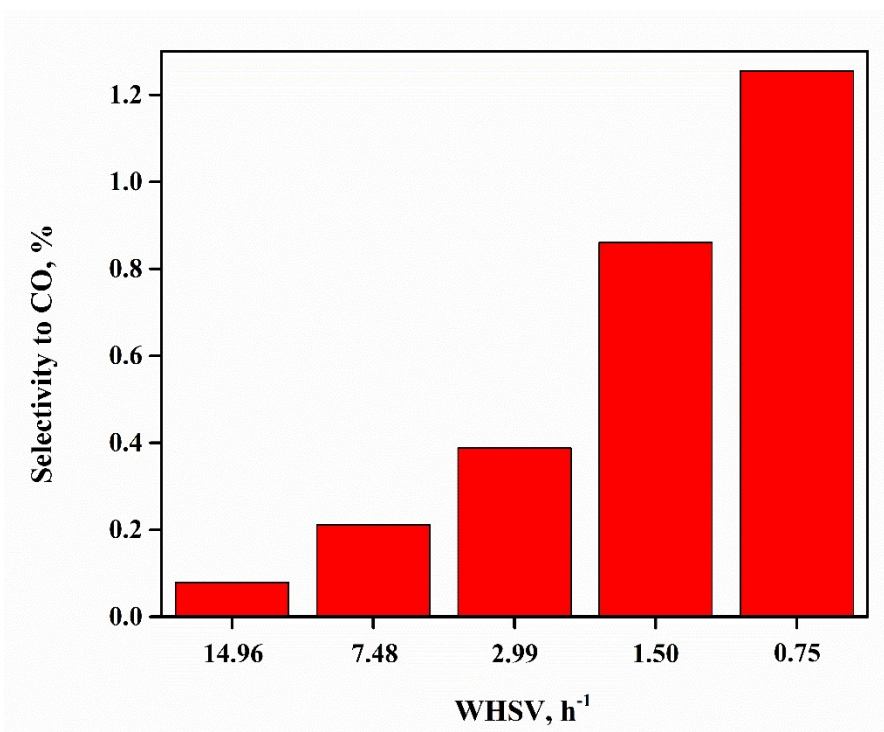

**Fig. S22** Effect of WHSV on selectivity of CO, Reaction conditions: Temperature = 823 K; Pressure = 1 atm; 5Ga-HZSM5 catalyst.

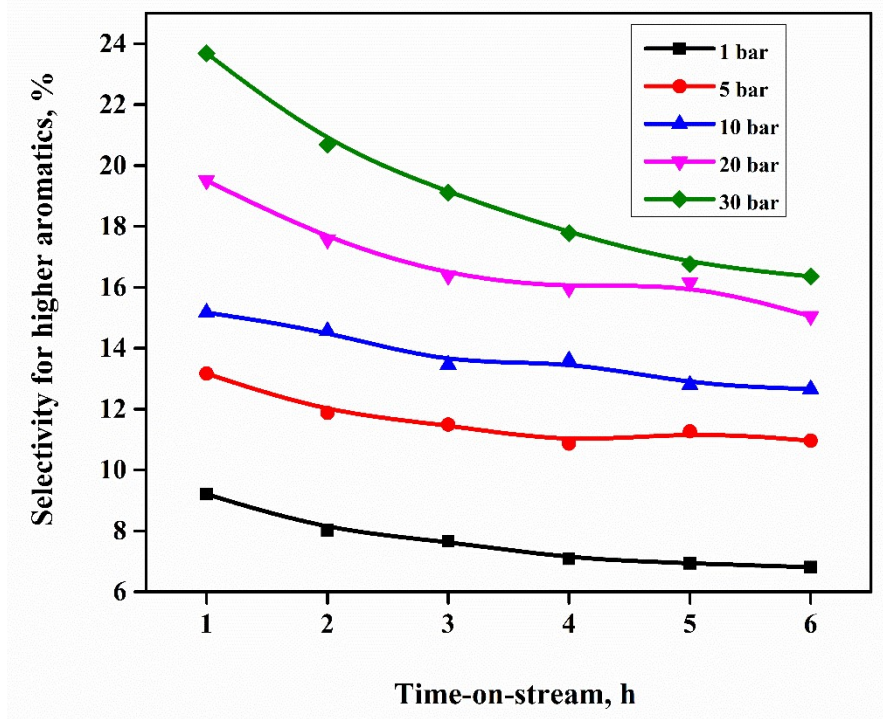

**Fig. S23** Effect of pressure on higher aromatics selectivity over 6 h TOS, Reaction conditions: Temperature = 823 K; WHSV = 0.75 h<sup>-1</sup>; 5Ga-HZSM5 catalyst.

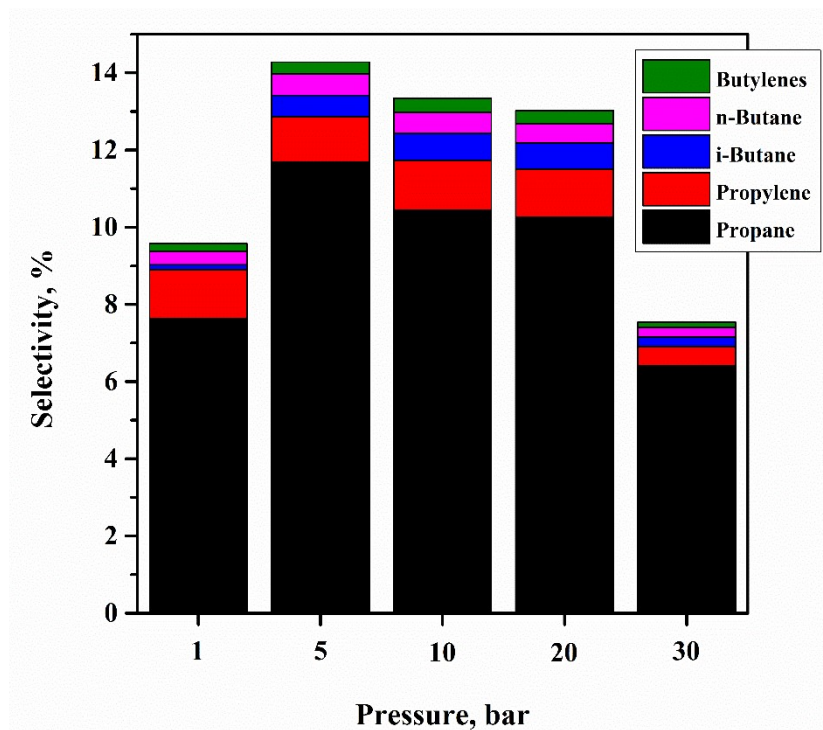

**Fig. S24** Effect of pressure on selectivity of C<sub>3</sub>-C<sub>4</sub> hydrocarbons, Reaction conditions: Temperature = 823 K; WHSV = 0.75 h<sup>-1</sup>; 5Ga-HZSM5 catalyst.

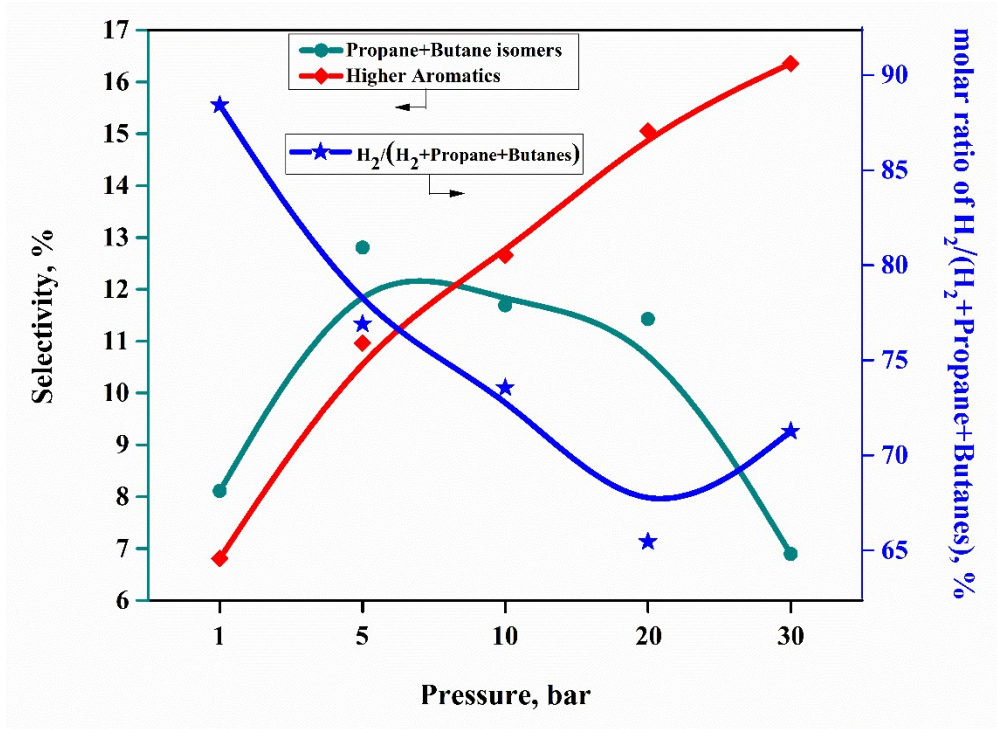

**Fig. S25** Effect of pressure on molar ratios of  $H_2/(H_2+Propane+Butanes)$  and  $C_3-C_4$  paraffins selectivity, Reaction conditions: Temperature = 823 K; WHSV = 0.75  $h^{-1}$ ; 5Ga-HZSM5 catalyst.

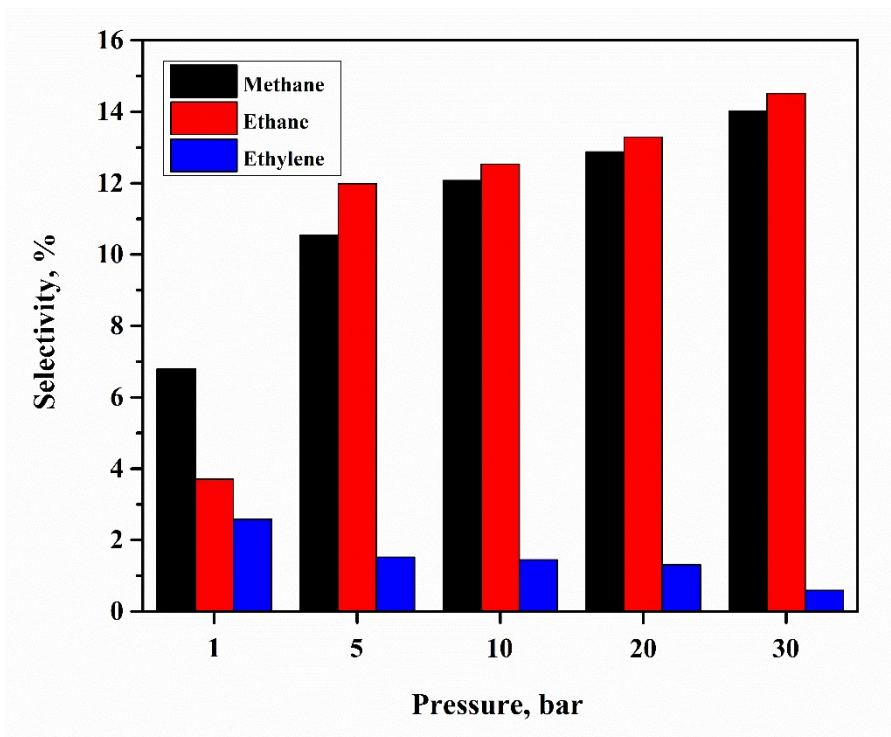

**Fig. S26** Effect of pressure on selectivity of  $C_1-C_2$  hydrocarbons, Reaction conditions: Temperature = 823 K; WHSV = 0.75  $h^{-1}$ ; 5Ga-HZSM5 catalyst.



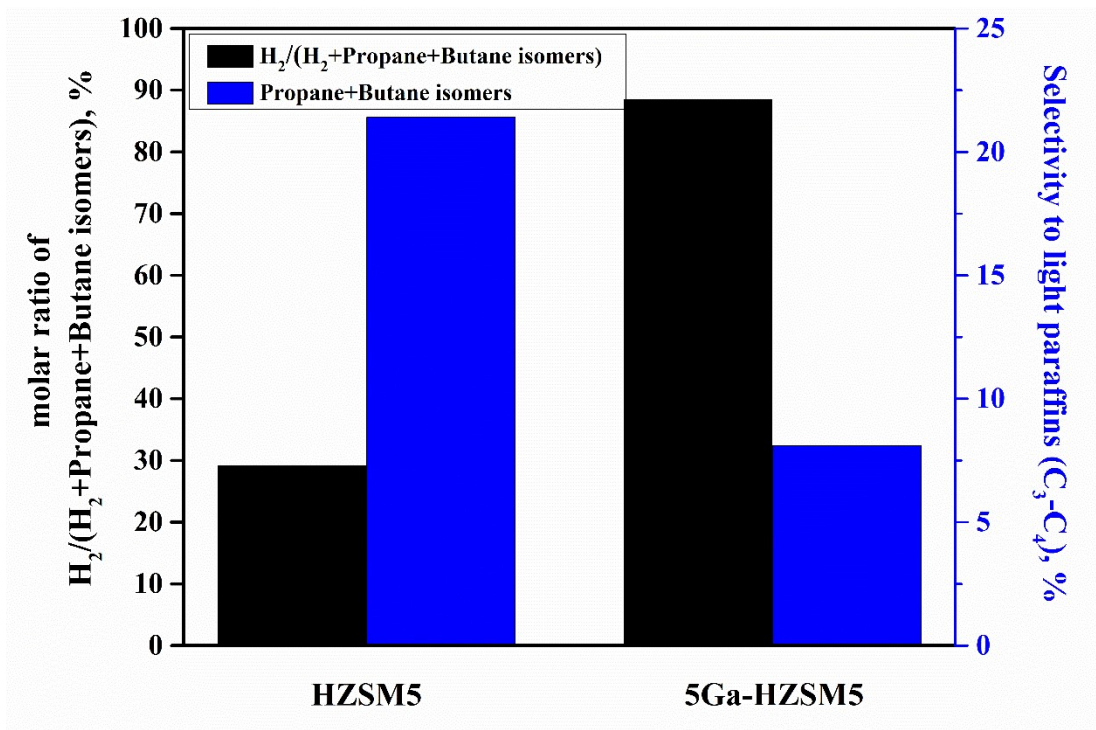

**Fig. S27** Molar ratios of H<sub>2</sub>/(H<sub>2</sub>+Propane+Butanes) and C<sub>3</sub>-C<sub>4</sub> paraffins selectivity over HZSM5 and 5Ga-HZSM5 catalyst, Reaction conditions: Temperature = 823 K; WHSV = 0.75 h<sup>-1</sup>; Pressure = 1atm.

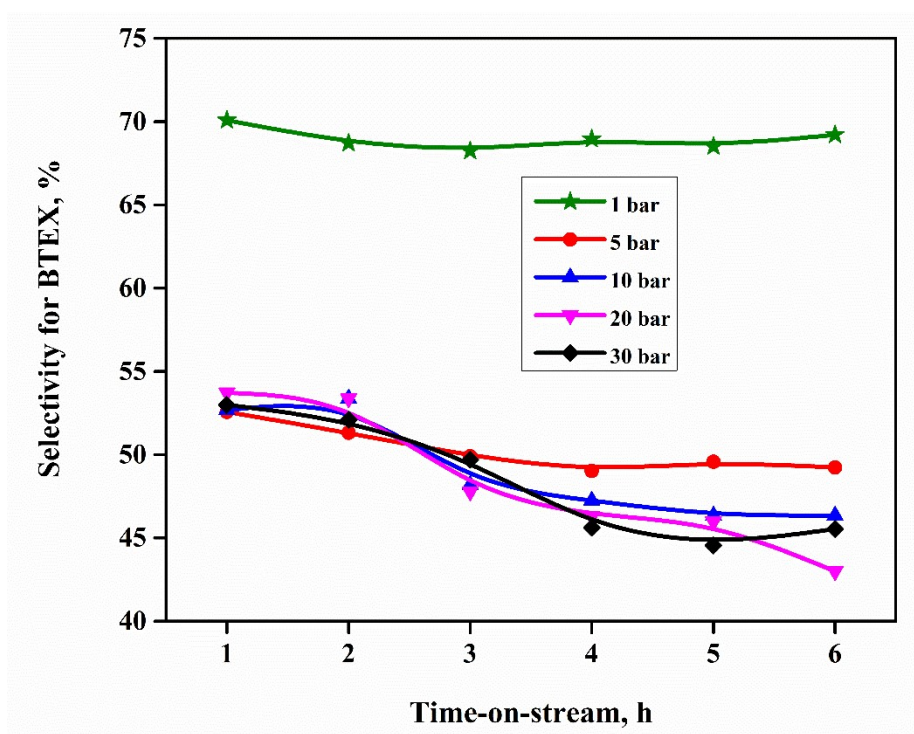

**Fig. S28** Effect of pressure on BTEX selectivity over 6 h TOS, Reaction conditions: Temperature = 823 K; WHSV = 0.75 h<sup>-1</sup>; 5Ga-HZSM5 catalyst.

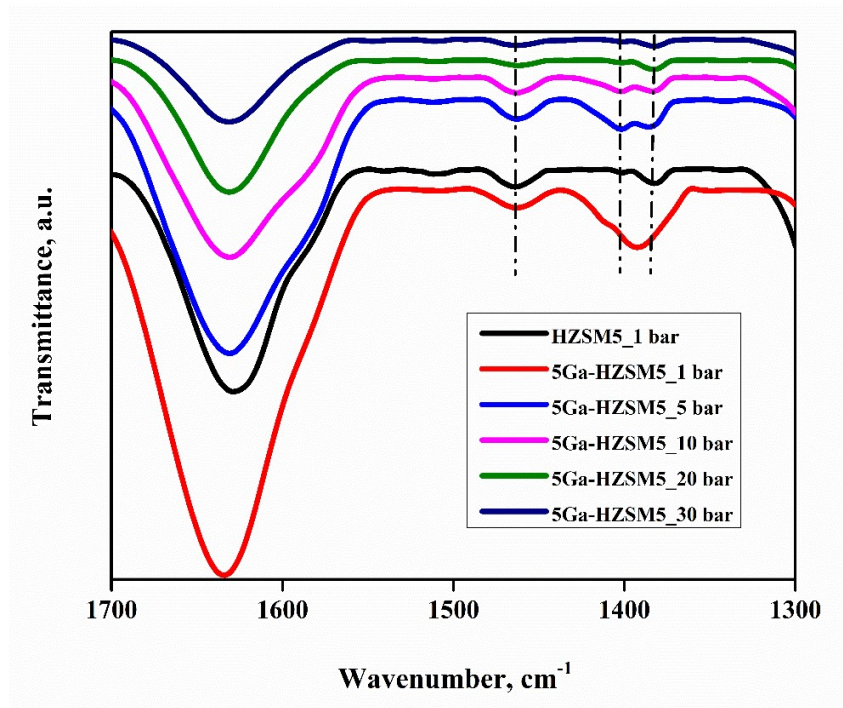

**Fig. S29** FTIR spectra of spent HZSM5 and 5Ga-HZSM5 catalysts at different reaction pressure.

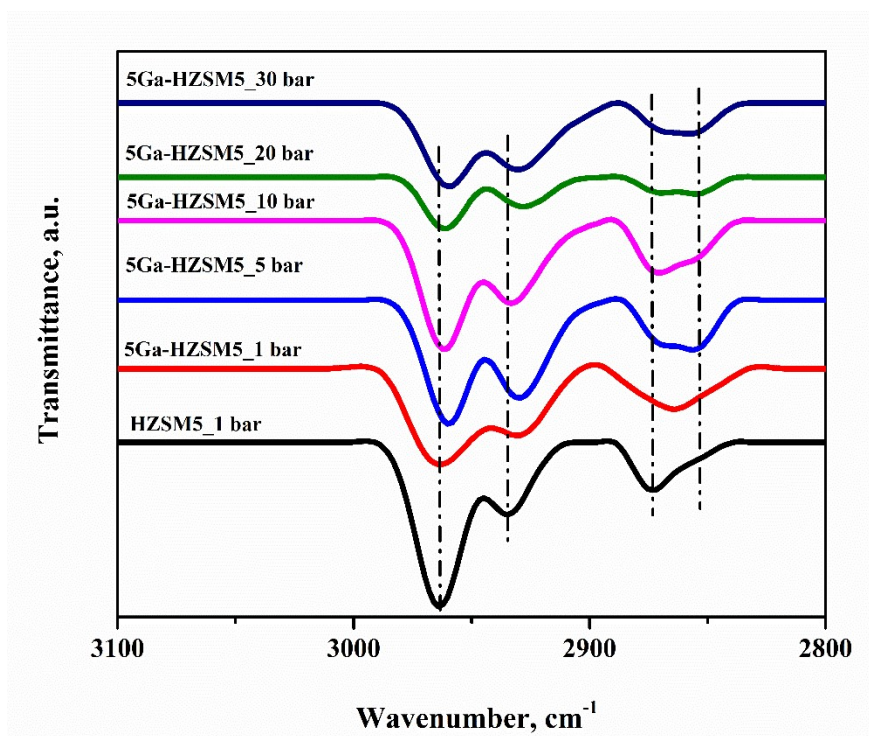

**Fig. S30** FTIR spectra of spent HZSM5 and 5Ga-HZSM5 catalysts at different reaction pressure.

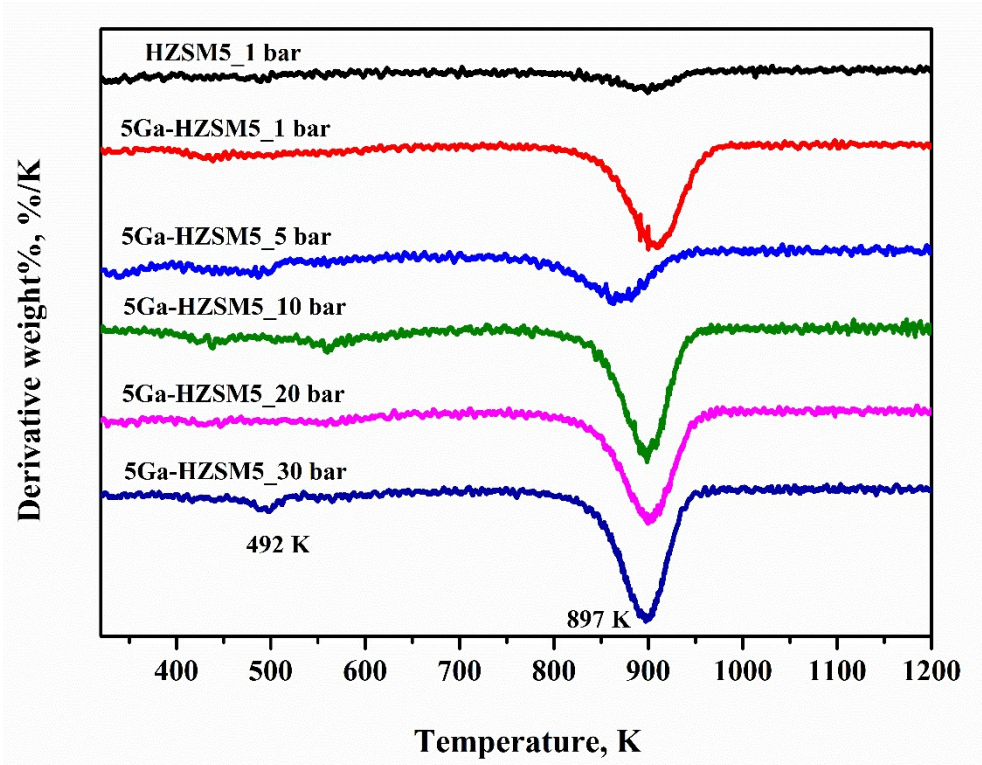

Fig. S31 DTGA analysis of spent HZSM5 and 5Ga-HZSM5 catalysts.
